# Supplementary material for: Superparamagnetic nanocrystal clusters for enrichment of low-abundance peptides and proteins
Source: Royal Society of Chemistry journal article supplement (doi:10.1039/c0cc01734e), 2010-01-01
Supplement: c0cc01734e.pdf [file c0cc01734e.pdf]

## Supporting Information

### Superparamagnetic Nanocrystal Clusters for Enrichment of Low-Abundance Peptides and Proteins

Zhenda Lu, Le He and Yadong Yin\*

Department of Chemistry, University of California, Riverside, 92521

\*To whom the correspondence should be addressed. Email: yadong.yin@ucr.edu

#### *Materials*

Oleic acid, iron pentacarbonyl ( $\text{Fe}(\text{CO})_5$ ), dioctyl ether, sodium dodecyl sulfate (SDS), trifluoroacetic acid (TFA),  $\alpha$ -cyano-4-hydroxycinnamic acid (CHCA), cytochrome c, bovine serum albumin (BSA, fraction V) and trypsin were purchased from Aldrich Chemical Co. Angiotensin II was obtained from VWR. Ethanol, cyclohexane, acetonitrile and HyperSep<sup>TM</sup> C18 Tip (TipC18) were obtained from Fisher Scientific. All solutions were prepared in deionized water (18 M $\Omega$ ) from a Milli.Q<sup>TM</sup> water purification system (Millipore, Billerica, MA, USA).

#### *Synthesis of $\gamma\text{-Fe}_2\text{O}_3$ nanocrystals*

Superparamagnetic  $\gamma\text{-Fe}_2\text{O}_3$  nanocrystals were synthesized using a thermolysis process.<sup>1</sup>  $\text{Fe}(\text{CO})_5$  (0.2 mL, 1.52 mmol) was added to a mixture containing 10 mL of octyl ether and 1.28 g of oleic acid at 100 °C. Then the solution was heated to 290 °C under an argon atmosphere and maintained at this temperature for 1 h. After being cooled down to 200 °C, the solution was bubbled with air for 2 hours. After cooling down to room temperature, the solution was added ethanol to precipitate  $\gamma\text{-Fe}_2\text{O}_3$  nanoparticles, which were then separated by centrifugation. Finally, the resulting black powder was redispersed in 10 mL cyclohexane.

#### *Self-assembly of nanocrystals to colloidal clusters*

In a typical experiment<sup>2, 3</sup>, a cyclohexane solution of  $\gamma\text{-Fe}_2\text{O}_3$  nanocrystals (1 mL) was mixed with an aqueous solution of SDS (56 mg in 10 mL  $\text{H}_2\text{O}$ ) under sonication for 5~10 minutes. The mixture was then heated to 70 – 72 °C in a water bath for 4 hours. A clear nanoparticle "micelle" solution was obtained after evaporation of cyclohexane. The final products were washed with water three times and re-dispersed in 2 mL of water.

#### *Tryptic digests of proteins*

BSA (1 mg/mL, 1 mL) was mixed with trypsin (1 mg/mL, 20  $\mu\text{L}$ ) in aqueous ammonium bicarbonate (50 mM, pH = 8) and incubated at 37 °C for 24 hours. The resulting peptide mixtures were stored at -20 °C until further use.

### ***Selective enrichment of peptides/proteins using the clusters***

In a typical process, a suspension of nanocrystal clusters (10  $\mu\text{L}$ , 10 mg/mL) was added into 500  $\mu\text{L}$  of standard peptide, protein or protein digest at varied concentrations. (Angiotensin II (8 nM), cytochrome C (500 nM) and peptide mixture originating from tryptic digestion of BSA (6 nM)). Then the mixture was shaken at room temperature for 30 minutes. The peptide or protein-loaded clusters were collected by external magnet and washed with 100  $\mu\text{L}$  of water three times. After that, 1  $\mu\text{L}$  of CHCA aqueous solution (1 mg/mL, 50% acetonitrile and 0.1% TFA) was mixed with the obtained clusters. Finally, 0.5  $\mu\text{L}$  of above slurry was deposited on the MALDI plate and applied for MALDI-TOF MS analysis.

### ***Sample preparation using commercial TipC18***

The sample preparation of peptides using commercial Hypersep<sup>TM</sup> C18 pipette tips was performed according to the standard procedure provided by the technical note from Thermo Scientific corporation.

### ***Structure characterization***

The morphology of the nanostructures was investigated using a Philips Tecnai 12 transmission electron microscope (TEM). Dynamic light scattering (DLS) and zeta potential analysis were performed on a ZetaPALS system.

### ***MALDI-TOF MS***

Matrix assisted laser desorption/ionization mass spectra were obtained by using a Voyager-DE STR MALDI-TOF mass spectrometer (Applied Biosystems, Framingham, MA, USA) operating in positive reflector mode. The spectrometer is equipped with a pulsed nitrogen laser operated at 337 nm with 3 ns duration pulses. Mass spectra were acquired as an average of 100 laser shots. Peptide mass mapping was carried out by comparing the mass spectra with the protein sequence database in ExPASy.

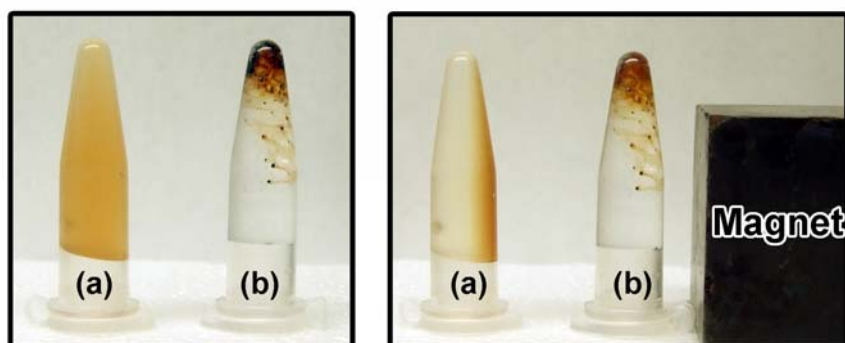

**Figure S1.** Digital photos of (a) as-synthesized clusters and (b) corresponding primary  $\gamma\text{-Fe}_2\text{O}_3$  nanocrystals dispersed in water before and after exposure to external magnetic fields.

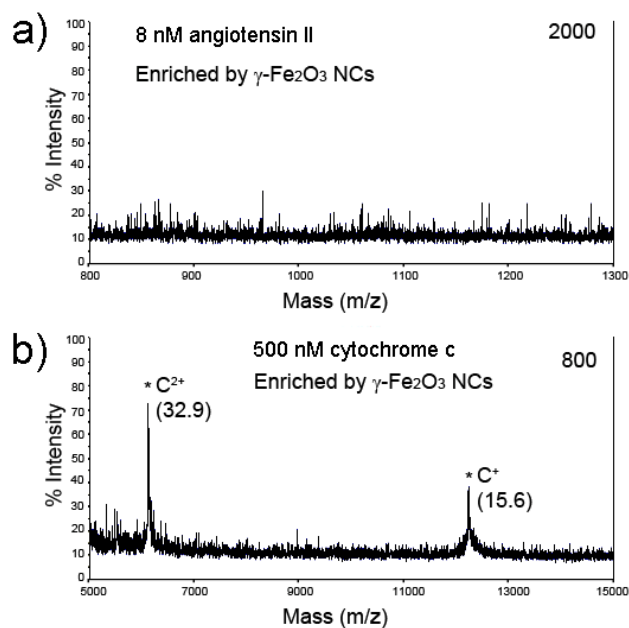

**Figure S2.** MALDI-TOF mass spectra of (a) angiotensin II (8 nM solution) and (b) cytochrome c (500) after enrichment with the non-clustered  $\gamma$ -Fe<sub>2</sub>O<sub>3</sub> nanocrystals.

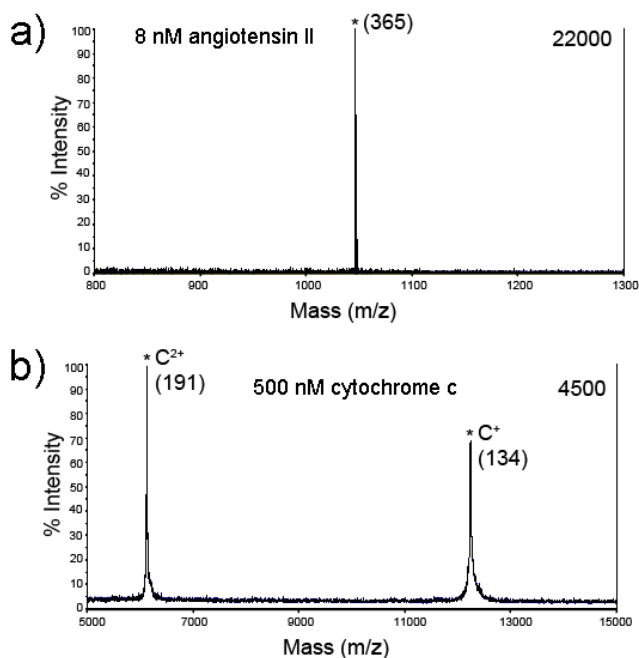

**Figure S3.** MALDI-TOF mass spectra of (a) angiotensin II (8 nM solution containing 100 mM of CaCl<sub>2</sub>) and (b) cytochrome c (500 nM solution containing 100 mM of CaCl<sub>2</sub>) after enrichment with the  $\gamma$ -Fe<sub>2</sub>O<sub>3</sub> nanocrystal clusters.

**Table S1.** Peptide peaks of detected peptides from tryptic digests of BSA by MALDI-TOF mass analysis.

| Peak No | Theroretical mono [M+H] <sup>+</sup> | Theroretical av. [M+H] <sup>+</sup> | Observed [M+H] <sup>+</sup> | Sequence               |
|---------|--------------------------------------|-------------------------------------|-----------------------------|------------------------|
| b1      | 841.5                                | 842.0                               | 841.9                       | LCVLHEK                |
| b2      | 927.5                                | 928.1                               | 927.8                       | YLYEIAR                |
| b3      | 1015.5                               | 1016.2                              | 1018.0                      | SHCIAEVEK              |
| b4      | 1052.5                               | 1053.2                              | 1052.9                      | CCTKPESER              |
| b5      | 1163.6                               | 1164.3                              | 1164.0                      | LVNELTEFAK             |
| b6      | 1069.5                               | 1070.2                              | 1171.0                      | EACFAVEGPK             |
| b7      | 1249.6                               | 1250.4                              | 1250.0                      | FKDLGEEHFK             |
| b8      | 1305.7                               | 1306.5                              | 1306.1                      | HLVDEPQNLIK            |
| b9      | 1349.5                               | 1350.5                              | 1349.7                      | TCVADESHAGCEK          |
| b10     | 1362.7                               | 1363.6                              | 1363.0                      | SLHTLFGDELCK           |
| b11     | 1388.6                               | 1389.5                              | 1388.0                      | EYEATLEECCA            |
| b12     | 1479.8                               | 1480.7                              | 1482.2                      | LGEYGFQNALIVR          |
| b13     | 1511.8                               | 1512.7                              | 1513.4                      | VPQVSTPTLVEVSR         |
| b14     | 1578.6                               | 1579.7                              | 1577.1                      | ECCHGDLLECADDR         |
| b15     | 1616.7                               | 1617.8                              | 1616.1                      | QEPERNECFLSHK          |
| b16     | 1640.0                               | 1640.9                              | 1640.4                      | KVPQVSTPTLVEVSR        |
| b17     | 1723.8                               | 1724.9                              | 1722.2                      | DAFLGSFLYEYSRR         |
| b18     | 1756.7                               | 1758.0                              | 1756.3                      | CCAADDKEACFAVEGPK      |
| b19     | 1823.9                               | 1825.1                              | 1825.4                      | RPCFSALTPDETYVPK       |
| b20     | 1942.8                               | 1944.2                              | 1942.3                      | VHKECCHGDLLECADDR      |
| b21     | 2003.8                               | 2005.2                              | 2003.3                      | ETYGDMADCCEKQEPER      |
| b22     | 2045.0                               | 2046.3                              | 2044.3                      | RHPYFYAPELLYYANK       |
| b23     | 2174.0                               | 2175.5                              | 2173.4                      | ECCDKPLLEKSHCIAEVEK    |
| b24     | 2220.1                               | 2221.6                              | 2223.5                      | LFTFHADICTLPDEKQIK     |
| b25     | 2472.2                               | 2473.8                              | 2471.9                      | QNCDQFEKLGGEYGFQNALIVR |

## Reference:

- <sup>1</sup> T. Hyeon, S. S. Lee, J. Park, Y. Chung, and H. Bin Na, *Journal of the American Chemical Society*, 2001, **123**, 12798.
- <sup>2</sup> F. Bai, D. S. Wang, Z. Y. Huo, W. Chen, L. P. Liu, X. Liang, C. Chen, X. Wang, Q. Peng, and Y. D. Li, *Angewandte Chemie-International Edition*, 2007, **46**, 6650.
- <sup>3</sup> Z. D. Lu, M. M. Ye, N. Li, W. W. Zhong, and Y. D. Yin, *Angewandte Chemie-International Edition*, **49**, 1862.
